# Supplementary material for: Molecular Variation and Phylogeny within Fusarium avenaceum and Related Species
Source: MDPI journal article supplement (doi:10.3390/d14070574), 2022-07-18
Supplement: s1 [file s1]

Archive with 2 entries (2 files):
- Supplementary figures for the manuscript-12-07-2022.pdf
- Supplementary table 1b.pdf
