# Supplementary material for: Molecular Variation and Phylogeny within Fusarium avenaceum and Related Species
Source: MDPI journal article supplement (doi:10.3390/d14070574), 2022-07-18
Supplement: s1 [file s1]

**Supplementary Table S1.** Accession numbers of *Fusarium* strains used in the present study.

| Group         | FTSC* | Morphological species      | Strain no.  | Alternative strain no.** | TEF1 accession no. | TUB2 accession no. |
|---------------|-------|----------------------------|-------------|--------------------------|--------------------|--------------------|
| Main group I  | 4     | <i>F. avenaceum</i>        | MFG 118702  | av48 <sup>c</sup>        | OK564512           | AF405448           |
|               |       | <i>F. arthrosporioides</i> | MFG 58655   | ar57 <sup>c</sup>        | OK564512           | AF405448           |
|               |       | <i>F. avenaceum</i>        | BBA 64151   | a2 <sup>b</sup>          | JX397832           | AF405448           |
|               |       | <i>F. arthrosporioides</i> | BBA 71186   | ar7 <sup>b</sup>         | OK564513           | AF405448           |
|               |       | <i>F. anguioides</i>       | MFG 114605  | an41 <sup>c</sup>        | OK564512           | AF405448           |
|               |       | <i>F. anguioides</i>       | MFG 119913  | an42 <sup>c</sup>        | KJ508146           | NA                 |
|               |       | <i>F. anguioides</i>       | MFG 108904  | an45 <sup>c</sup>        | OK564510           | AF405458           |
|               |       | <i>F. arthrosporioides</i> | BBA 67701   | ar5 <sup>b</sup>         | JX397826           | AF405447           |
|               |       | <i>F. avenaceum</i>        | KK12        | NA                       | HQ704115           | NA                 |
|               |       | <i>F. avenaceum</i>        | DDPP11.73   | NA                       | HQ704082           | NA                 |
|               |       | <i>F. avenaceum</i>        | F1          | NA                       | HQ704106           | NA                 |
|               |       | <i>F. avenaceum</i>        | 18          | NA                       | HQ704074           | NA                 |
|               |       | <i>F. avenaceum</i>        | DDPP 042836 | NA                       | HQ704102           | NA                 |
|               |       | <i>F. avenaceum</i>        | DDPP 04032  | NA                       | HQ704092           | NA                 |
|               |       | <i>F. avenaceum</i>        | K-0238      | NA                       | KJ508148           | NA                 |
|               |       | <i>F. avenaceum</i>        | FCR R6679   | NA                       | OL772751           | NA                 |
|               |       | <i>F. avenaceum</i>        | NRRL 26890  | NA                       | OL772749           | NA                 |
|               |       | <i>F. avenaceum</i>        | FRC R-6751  | NA                       | OL772752           | NA                 |
|               |       | <i>F. avenaceum</i>        | FaLH27      | NA <sup>d</sup>          | JQGE000000<br>000  | JQGE000000<br>00   |
|               |       | <i>F. avenaceum</i>        | MRC 2195    | FRC R6381                | MH582393           | NA                 |
|               |       | <i>F. avenaceum</i>        | CML 3538    | NA                       | MK572765           | NA                 |
|               |       | <i>F. avenaceum</i>        | J066        | NA                       | JX534413           | NA                 |
|               |       | <i>F. avenaceum</i>        | MRC 1413    | NA                       | MH582392           | NA                 |
| Main group II | 4     | <i>F. anguioides</i>       | MFG 112804  | an37 <sup>c</sup>        | OK564510           | AF405458           |
|               |       | <i>F. arthrosporioides</i> | BBA 70576   | ar1 <sup>b</sup>         | JX397834           | AF405454           |
|               |       | <i>F. avenaceum</i>        | FaLH03      | NA <sup>d</sup>          | JQGD0000<br>0000   | JQGD000000<br>00   |
|               |       | <i>F. avenaceum</i>        | NRRL 54939  | Fa05001 <sup>d</sup>     | JPYM01000<br>002   | JPYM010000<br>02   |
|               |       | <i>F. avenaceum</i>        | F093        | NA                       | HQ020451           | NA                 |
|               |       | <i>F. avenaceum</i>        | NRRL 25128  | NA                       | JF740751           | NA                 |
|               |       | <i>F. avenaceum</i>        | CBS 15957   | NA                       |                    | NA                 |
|               |       | <i>F. avenaceum</i>        | DDPP 09a1   | NA                       | HQ704081           | NA                 |
|               |       | <i>F. anguioides</i>       | MFG 74005   | NA                       | KJ508134           | NA                 |
|               |       | <i>F. avenaceum</i>        | F-132       | NA                       | KU304436           | NA                 |
|               |       | <i>F. anguioides</i>       | MFG 111502  | NA                       | KU304432           | NA                 |
| Main group V  | 4     | <i>F. avenaceum</i>        | NRRL 36069  | CBS 101627               | OL772758           | NA                 |
|               |       | <i>F. avenaceum</i>        | NRRL 53589  | CBS 386.62               | OL772759           | NA                 |
|               |       | <i>F. avenaceum</i>        | NRRL 53729  | CBS 121289               | OL772760           |                    |
|               |       | <i>F. avenaceum</i>        | CBS 409.86  | NA                       | HQ704078           | NA                 |
|               |       | <i>F.avenaceum</i>         | 05-003      | NA                       | HQ704072           | NA                 |
|               |       | <i>F. avenaceum</i>        | 376         | NA                       | HQ704075           | NA                 |

|                                                 |    |                             |                          |                               |                  |                   |
|-------------------------------------------------|----|-----------------------------|--------------------------|-------------------------------|------------------|-------------------|
| Intermediate group between main groups I and II | 4  | <i>F. avenaceum</i>         | IBT 40026                | NA                            | HQ704112         | NA                |
|                                                 |    | <i>F. avenaceum</i>         | CBS 409.86               | NA                            |                  |                   |
|                                                 |    | <i>F. avenaceum</i>         | DDPP 04401               | NA***                         | HQ704098         | NA                |
|                                                 |    | <i>F. avenaceum</i>         | 379                      | NA                            | HQ704076         | NA                |
|                                                 | 4  | <i>F. avenaceum</i>         | CML 3545                 | NA                            | MK572772         | NA                |
|                                                 |    | <i>F. avenaceum</i>         | FCR R-9495               |                               | EU357823         | EU357854          |
|                                                 |    |                             |                          | NA                            |                  |                   |
|                                                 |    | <i>F. avenaceum</i>         | MFG 80310                | NA                            | EU357823         | NA                |
|                                                 |    | <i>F. avenaceum</i>         | F-2307                   | NA                            | KU304440         | NA                |
|                                                 |    | <i>F. avenaceum</i>         | NRRL 36374               | CBS 239.94                    | OL772755         | NA                |
|                                                 |    | <i>Gibberella tricineta</i> | NRRL 39591               | ICMP 5244                     | OL772757         | NA                |
|                                                 |    | <i>F. avenaceum</i>         | NRRL 53733               | CBS 121294                    | OL772756         | NA                |
| Unknown group I                                 | 22 | <i>F. avenaceum</i>         | FRC R-6739               | NA                            | OL772764         | NA                |
|                                                 |    | <i>F. avenaceum</i>         | BBA 63201                | a4 <sup>b</sup>               | JX397829         | NA                |
| Main group III                                  | 11 | <i>F. anguioides</i>        | MFG 58314                | an47 <sup>c</sup>             | OK564511         | EU357852          |
|                                                 |    | <i>Fusarium</i> sp.         | CML 3541                 | NA                            | MK572768         | NA                |
|                                                 |    | <i>F. avenaceum</i>         | FRC-R9369                | NA                            | EU357821         | EU357852          |
|                                                 |    | <i>F. avenaceum</i>         | JRBK-5                   | NA                            | KY475585         | KY475586          |
|                                                 |    | <i>F. avenaceum</i>         | SICAUCC 18-0001          | NA                            | MK226333         | MK253102          |
|                                                 |    | <i>F. sp. nov-9</i>         | MRC 2532                 | NA                            | MH582395         | NA                |
|                                                 |    | <i>F. avenaceum</i>         | Fv5-9                    | NA                            | MK111429         | NA                |
|                                                 | 27 | <i>F. anguioides</i>        | BBA 69055                | an3 <sup>b</sup>              | JX397839         | AF405458          |
| Main group IV                                   | 5  | <i>F. avenaceum</i>         | BBA 70177                | a49 <sup>a</sup> , NRRL 26893 | OK564509         | AF405453          |
|                                                 |    | <i>Fusarium</i> sp.         | NRRL 52726               | NA                            | JF740806         | NA                |
|                                                 |    | <i>Fusarium</i> sp.         | KOD 810                  | NA                            |                  |                   |
|                                                 |    | <i>F. avenaceum</i>         | 10992                    | NA                            | JX398938         | JX398943          |
|                                                 |    | <i>F. avenaceum</i>         | E19/2-4                  | NA                            | MN976063         | NA                |
| Unknown group II                                | 30 | <i>F. arthrosporioides</i>  | BBA 70561 <sup>b,e</sup> | ar2 <sup>b</sup>              | JX397832         | AF405455          |
| Unknown group III                               | ?  | <i>F. avenaceum</i>         | MFG 80212                | NA                            | KJ508135         | NA                |
| Unknown group IV                                | 34 | <i>F. avenaceum</i>         | BBA 70575 <sup>b,e</sup> | a5 <sup>b</sup>               | JX397833         | AF405461          |
|                                                 | 9  | <i>F. torulosum</i>         | NRRL 22747               | NA                            | JABFMN 000000000 | JABFMN000 000000  |
|                                                 | 3  | <i>F. tricinatum</i>        | NRRL 25481               |                               | JAALXJ000 000000 | JAALXJ0000 000000 |
|                                                 |    | <i>F. tricinatum</i>        | BBA 64485                | NA t6 <sup>b</sup>            | JX397841         | AF405452          |
|                                                 | 2  | <i>F. acuminatum</i>        | NRRL 36147               | NA                            | GQ505420         | NA                |

|                      |            |        |          |           |
|----------------------|------------|--------|----------|-----------|
| <i>F. acuminatum</i> | NRRL 62622 |        | CBMG0100 | CBMG01000 |
|                      |            | CS5907 | 00000    | 0000      |

---

\*FTSC marked according to [11]; \*\*The alternative names of strains are from [47], [16], [5], [48], and [46] for a, b, c, d, and e, respectively; \*\*\*NA means not available.
